# Supplementary material for: Targeting protein homeostasis with nelfinavir/salinomycin dual therapy effectively induces death of mTORC1 hyperactive cells
Source: PubMed Central journal article supplement (PMC5564719; doi:10.18632/oncotarget.16232), 2017-03-15
Supplement: oncotarget-08-48711-s001.pdf [file oncotarget-08-48711-s001.pdf]

## Targeting protein homeostasis with nelfinavir/salinomycin dual therapy effectively induces death of mTORC1 hyperactive cells

### Supplementary Materials

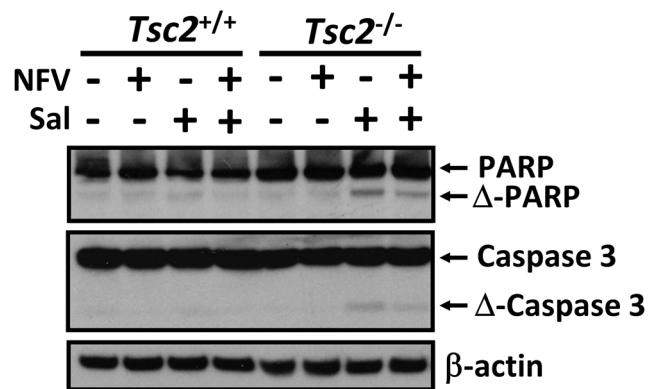

**Supplementary Figure 1: The classical apoptotic cascade is minimally activated in response to nelfinavir and salinomycin.** Samples from Figure 4A were probed for PARP and caspase 3 cleavage.
